# Supplementary material for: Tuning the binding configurations of single-molecule junctions by molecular co-assembly
Source: Royal Society of Chemistry journal article supplement (doi:10.1039/d2cc00406b), 2022-01-01
Supplement: d2cc00406b1.pdf [file d2cc00406b1.pdf]

## Electronic Supplementary Information

### **Tuning the binding configurations of single-molecule junctions by molecular co-assembly**

Ling Tong,<sup>a,#</sup> Shu-Yi Bao,<sup>a,#</sup> Chen-Chen Jiang,<sup>a</sup> Xiao-Chong Li,<sup>a</sup> Jia-Jie Li,<sup>a</sup> Xu-Nan Huang-Fu,<sup>a</sup> Ju-Fang Zheng,<sup>a</sup> Yong Shao,<sup>a</sup> Ya-Hao Wang,<sup>a,\*</sup> Yi-Jing Gao,<sup>a,b,\*</sup> Xiao-Shun Zhou<sup>a,\*</sup>

<sup>a</sup>Key Laboratory of the Ministry of Education for Advanced Catalysis Materials, Institute of Physical Chemistry, Zhejiang Normal University, Jinhua, Zhejiang 321004, China

<sup>b</sup>Zhejiang Engineering Laboratory for Green Syntheses and Applications of Fluorine-Containing Specialty Chemicals, Institute of Advanced Fluorine-Containing Materials, Zhejiang Normal University, Jinhua 321004, China

### Contents

|                                                      |    |
|------------------------------------------------------|----|
| Experiments and methods .....                        | S2 |
| Raman measurements .....                             | S2 |
| STM breaking junction measurements .....             | S2 |
| Computational models and methodology .....           | S3 |
| Supplementary Figures .....                          | S4 |
| Fig. S1 In-situ STM images .....                     | S4 |
| Fig. S2 Conductance histogram of EIM .....           | S5 |
| Fig. S3 Conductance histograms obtained in air ..... | S6 |
| Fig. S4 SEM and TEM images .....                     | S7 |
| Fig. S5 Optimized adsorption geometries.....         | S8 |
| References.....                                      | S9 |

## Experiments and methods

### Raman measurements

55 nm Au nanoparticles were prepared according to Frens' method,<sup>1</sup> namely, 1.5 mL of 1 wt% sodium citrate solution was quickly added into 200 mL of 0.01 wt% boiling HAuCl<sub>4</sub> solution. Then the mixture was refluxed for 20 min to obtain the spherical nanoparticles. The 55 nm Au@ ca. 2 nm SiO<sub>2</sub> nanoparticles were prepared according to the previous report<sup>2</sup>: 0.4 mL of 1 mM (3-Aminopropyl) trimethoxysilane (APTMS) solution was dropwise added into 30 mL of the as-prepared Au solution, and the mixture was stirred for 15 min at room temperature. Next, 3.2 mL of 0.54 wt% sodium silicate solution was quickly added to the solution. Finally, the solution was transferred to 99°C bath and stirred for 30 min for the coating of a silica shell with a thickness of about 2 nm. The 1.5 mL of hot solution was cooled in an ice bath to stop the reaction immediately, then were centrifuged at 4500 rpm twice and washed with Milli-Q water for the Raman measurements. The Raman experiments were carried out on a confocal microscope Raman system (Renishaw InVia). The excitation wavelength was 633 nm, and a 50× microscope objective with a numerical aperture of 0.55 was used.

### STM breaking junction measurements

Conductance measurement was carried out on a modified Nanoscope IIIa STM (Veeco, US). Au wire (0.25 mm diameter, 99.999%) was used to make STM tip, and Au (111) was used as the substrate. The tip was insulated by thermosetting polyethylene to reduce Faraday current at several pA level. Before each experiment, the substrate was polished by electrochemical method and annealed with butane gun. We carried out the conductance measurements in different concentrations of 1-ethylimidazole (EIM) containing 0.1 mM sample molecule at room temperature. The procedure of STM-BJ method is briefly described as follows. Firstly, the tip is driven toward the substrate to reach conductance value more than several  $G_0$ , then the tip is pulled away from the substrate at a constant speed of 20 nm/s. During the process, molecular junctions can be formed. Meanwhile, the current of the tip is recorded at a sampling rate of 20 kHz.

Thousands of tip current curves are collected to construct the conductance histogram without data selection. The conductance measurement is carried out at a bias voltage of 100 mV.

## Computational models and methodology

The density functional theory (DFT) calculations were performed by the Vienna *ab initio* simulation package<sup>3</sup> (VASP). The electron exchange and correlation was described by the generalized gradient approximation (GGA) with the Perdew, Burke, Ernzerhof (PBE)<sup>4</sup> functional. The ionic cores were represented by projector augmented wave (PAW) potentials with a cutoff energy of 400 eV. According to our previous study<sup>5</sup>, a lattice cell of three-layer p(4×4) Au(111) surface was built to optimize adsorption structure of molecule (4,4'-BPY or 1-ethylimidazole) in vacuum and Au(111) surface with four 1-ethylimidazole and thirty water molecules as solvent was built to optimize adsorption structure of 4,4'-BPY molecule in solution. DFT-D3 method<sup>6</sup> was employed to describe the van der Waals (vdW) interaction between adsorbate and solvent. The bottom two layers of Au surface were fixed, while the top one was relaxed. The Brillouin zone<sup>7</sup> was sampled by k-points mesh of 2×2×1 for structure optimization. The convergence criterion for the energy calculation was set to 1.0×10<sup>-5</sup> eV; while the force tolerance was set to 0.01 eV Å<sup>-1</sup>. The adsorption energy ( $E_{ad}$ ) of the different adsorbates follows the equation:

$$E_{ad} = E_{total} - (E_{sub} + E_{gas})$$

Where the  $E_{total}$ ,  $E_{sub}$ ,  $E_{gas}$  represent the total energy of substrate after adsorption, bare substrate, and the adsorbate molecule (4,4'-BPY or 1-ethylimidazole) in the gas phase, respectively.

## Supplementary Figures

**Fig. S1 In-situ STM images**

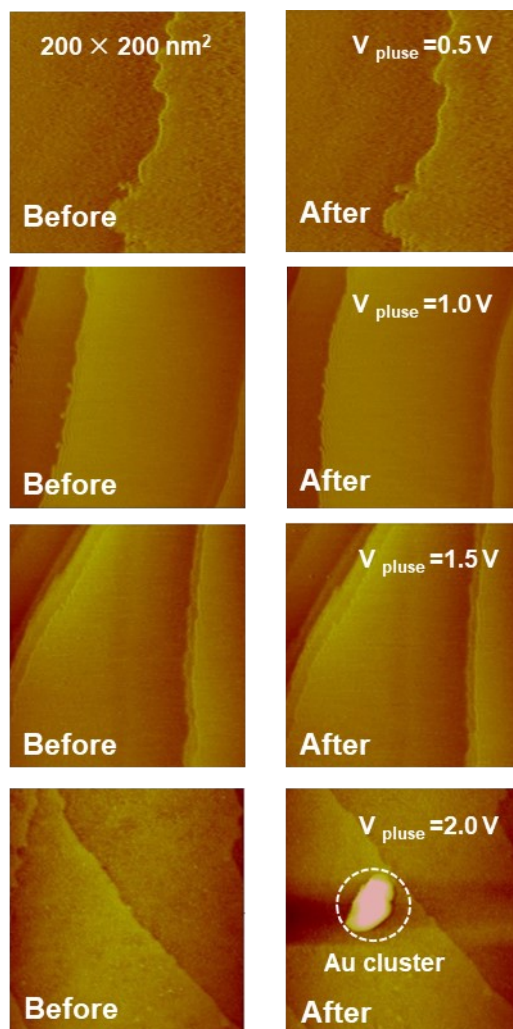

**Fig. S1** 200 × 200 nm<sup>2</sup> STM image obtained before and after conductance measurements with different pulse voltages ( $I_{\text{set}} = 0.3$  nA,  $V_{\text{bias}} = 0.1$  V).

Fig. S1 shows in-situ STM images recorded before and after breaking junctions with different  $V_{\text{pulse}}$  on the z-piezo for constructing molecular junctions. Obviously, at low  $V_{\text{pulse}}$ , there are no Au clusters or holes on the Au (111) substrate after the conductance measurements. Only  $V_{\text{pulse}}$  is as large as 2.0 V, an Au cluster about 2 nm in height left on the Au(111) substrate could be observed after the breaking junction experiments.

**Fig. S2 Conductance histogram of EIM**

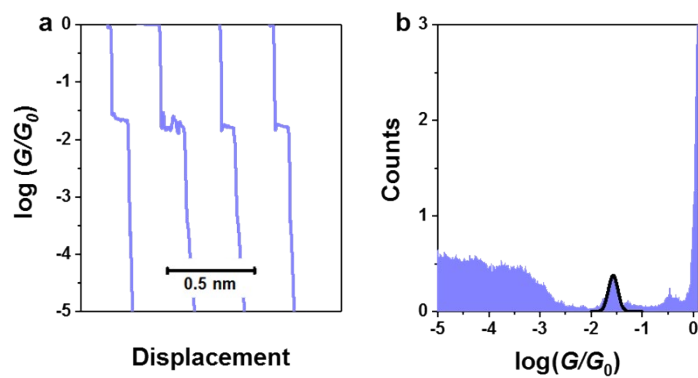

**Fig. S2** (a) Typical original conductance–distance traces of pure EIM and (b) 1D conductance histogram of EIM.

**Fig. S3 Conductance histograms obtained in air**

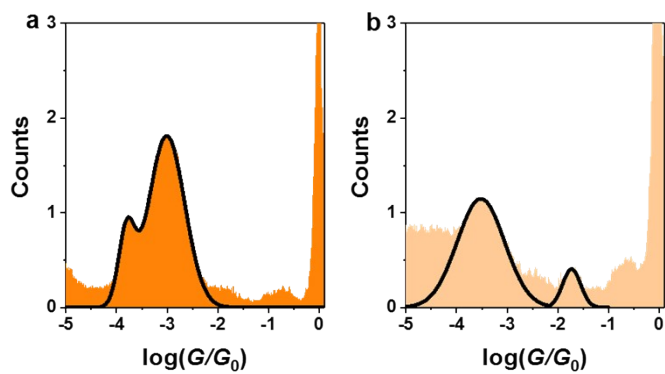

**Fig. S3** (a) 1D conductance histograms obtained in air with the dry self-assembled monolayer formed in (a) 0.1 mM 4,4'-BPY and (b) 10 mM EIM + 0.1 mM 4,4'-BPY solutions.

**Fig. S4 SEM and TEM images**

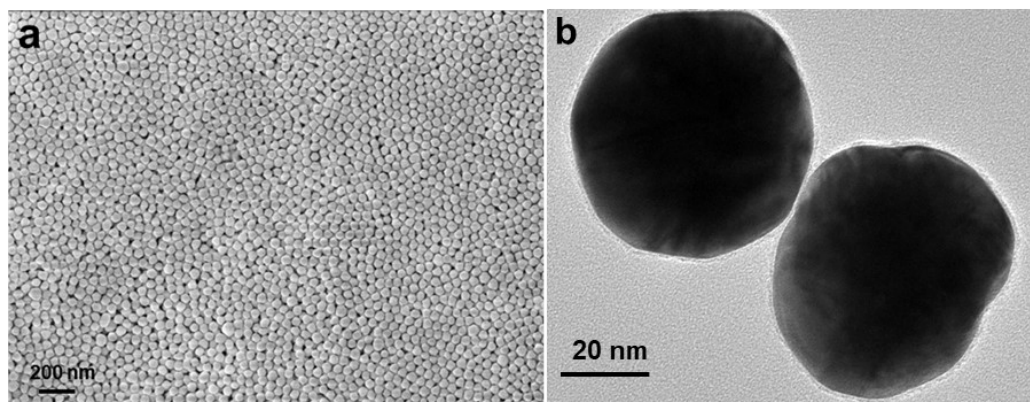

**Fig. S4.** The (a) SEM and (b) TEM image of as-prepared 55 nm Au @1~2 nm SiO<sub>2</sub>.

**Fig. S5** Optimized adsorption geometries

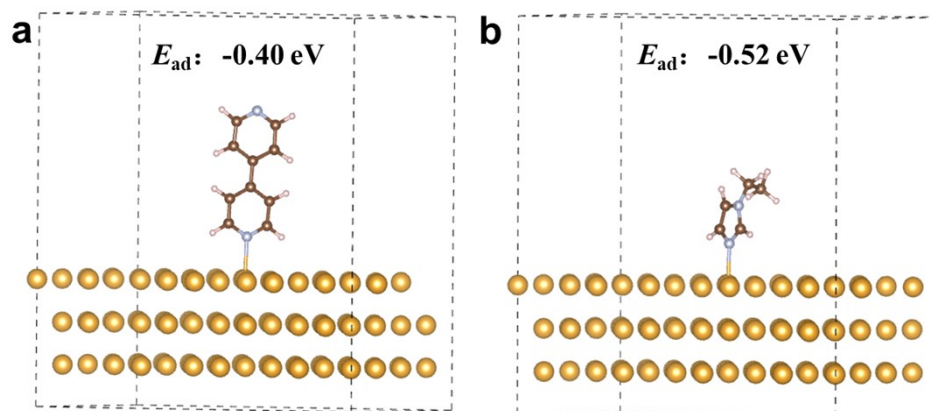

**Fig. S5.** The optimized adsorption geometries of (a) 4,4'-BPY and (b) 4 EIM molecules on the Au (111) surface.



## References

1. Frens, G., Controlled nucleation for the regulation of the particle size in monodisperse gold suspensions. *Nat. Phys. Sci.*, **1973**, 241 (105), 20-22.
2. Li, J. F.; Huang, Y. F.; Ding, Y.; Yang, Z. L.; Li, S. B.; Zhou, X. S.; Fan, F. R.; Zhang, W.; Zhou, Z. Y.; Wu, D. Y.; Ren, B.; Wang, Z. L.; Tian, Z. Q., Shell-isolated nanoparticle-enhanced Raman spectroscopy. *Nature* **2010**, 464 (7287), 392-395.
3. (a) Kresse, G.; Furthmüller, J., Efficiency of ab-initio total energy calculations for metals and semiconductors using a plane-wave basis set. *Comput. Mater. Sci.*, **1996**, 6 (1), 15-50; (b) Kresse, G.; Furthmüller, J., Efficient iterative schemes for ab initio total-energy calculations using a plane-wave basis set. *Phys. Rev. B.*, **1996**, 54 (16), 11169-11186.
4. Perdew, J. P.; Burke, K.; Ernzerhof, M., Generalized Gradient Approximation Made Simple. *Phys. Rev. Lett.*, **1996**, 77 (18), 3865-3868.
5. Zhang, S.; Wang, W.; Gao, Y.; Deng, S.; Ding, L.; Zhuo, H.; Bao, Z.; Ji, W.; Qiu, C.; Wang, J., Pd-Co alloy supported on TiO<sub>2</sub> with oxygen vacancies for efficient N<sub>2</sub> and O<sub>2</sub> electrocatalytic reduction. *Appl. Surf. Sci.*, **2021**, 567, 150680.
6. Grimme, S.; Antony, J.; Ehrlich, S.; Krieg, H., A consistent and accurate ab initio parametrization of density functional dispersion correction (DFT-D) for the 94 elements H-Pu. *J. Chem. Phys.*, **2010**, 132 (15), 154104.
7. Monkhorst, H. J.; Pack, J. D., Special points for Brillouin-zone integrations. *Phys. Rev. B.*, **1976**, 13 (12), 5188-5192.
